# Supplementary material for: Tumor cells fail to present MHC-II–restricted epitopes derived from oncogenes to CD4+ T cells
Source: PubMed Central journal article supplement (PMC9977289; doi:10.1172/jci.insight.165570), 2023-01-24
Supplement: jciinsight-8-165570-s215.pdf [file jciinsight-8-165570-s215.pdf]

**Supplemental Table S1: Patient details.**

| <b>ID</b> | <b>Age</b> | <b>Sex</b> | <b>Diagnosis</b>                                    | <b>Treatment History</b>                                                                                               | <b>Mutations</b>                                  |
|-----------|------------|------------|-----------------------------------------------------|------------------------------------------------------------------------------------------------------------------------|---------------------------------------------------|
| Hu-56     | 58         | F          | Right base of tongue squamous cell carcinoma (P16+) | Transoral robotic resection/neck dissection (pT1N2bcM0) and adjuvant chemoradiation                                    | unknown                                           |
| Hu-66     | 60         | M          | Pancreatic head adenocarcinoma                      | Neoadjuvant Gemcitabine/Abiraxane followed by pancreaticoduodenectomy (pT3N1cM0) and adjuvant Capecitabine/Gemcitabine | KRAS G12V, CDKN2A/B loss of exons 2-3, TP53 G244C |

**Supplemental Table S2: TCR gene sequences.**

| TCR  | Coreceptor | V                            | J                     | CDR3 $\alpha$    | CDR3 $\beta$     |
|------|------------|------------------------------|-----------------------|------------------|------------------|
| F29  | CD8        | TRAV14/DV4*02,<br>TRBV7-6*01 | TRAJ58*01, TRBJ1-5*01 | CAMREPRATSGSRLTF | CASSLGEGFSNQPQHF |
| F12  | CD4        | TRAV9-2*01,<br>TRBV6-1*01    | TRAJ40*01, TRBJ1-2*01 | CALSHYSGTYKYIF   | CASSEGTDYGYTF    |
| KRAS | CD4        | TRAV13-2,<br>TRBV5-4         | TRAJ53, TRBJ1-1       | CAENSGGSNYKLTF   | CASSWERAGKAFF    |

**Supplemental Table S3: Individual peptides contained within E6 pepmix.**

| Peptide ID | AA Sequence      |
|------------|------------------|
| E6-1       | MHQKRTAMFQDPQER  |
| E6-2       | RTAMFQDPQERPRKL  |
| E6-3       | FQDPQERPRKLPQLC  |
| E6-4       | QERPRKLPQLCTELQ  |
| E6-5       | RKLPQLCTELQTTIH  |
| E6-6       | QLCTELQTTIHDIL   |
| E6-7       | ELQTTIHDIIIECVY  |
| E6-8       | TIHDIIECVYCKQQ   |
| E6-9       | IIECVYCKQQLRR    |
| E6-10      | CVYCKQQLLRREVYD  |
| E6-11      | KQQLLRREVYDFAFR  |
| E6-12      | LRREVYDFAFRDLCI  |
| E6-13      | VYDFAFRDLCIVYRD  |
| E6-14      | AFRDLCIVYRDGNPY  |
| E6-15      | LCIVYRDGNPYAVCD  |
| E6-16      | YRDGNPYAVCDKCLK  |
| E6-17      | NPYAVCDKCLKFYSK  |
| E6-18      | VCDKCLKFYSKISEY  |
| E6-19      | CLKFYSKISEYRHYC  |
| E6-20      | YSKISEYRHYCYSLY  |
| E6-21      | SEYRHYCYSLYGTTL  |
| E6-22      | HYCYSLYGTTLQQY   |
| E6-23      | SLYGTTLQQYNKPL   |
| E6-24      | TTLEQQYNKPLCDLL  |
| E6-25      | QQYNKPLCDLLIRCI  |
| E6-26      | KPLCDLLIRCINCQK  |
| E6-27      | DLLIRCINCQKPLCP  |
| E6-28      | RCINCQKPLCPEEKQ  |
| E6-29      | CQKPLCPEEKQRHLD  |
| E6-30      | LCPEEKQRHLDKKQR  |
| E6-31      | EKQRHLDKKQRFHNI  |
| E6-32      | HLDKKQRFHNIIRGRW |
| E6-33      | KQRFHNIIRGRWTGRC |
| E6-34      | HNIRGRWTGRMSCC   |
| E6-35      | GRWTGRMSCCRSSR   |
| E6-36      | GRCMSCCRSSRTRRE  |
| E6-37      | SCCRSSRTRRETQL   |

**Supplemental Table S4: HLA class II genotyping of B cell lines.**

| <b>B Cell Line</b> | <b>DQA1</b> | <b>DQA2</b> | <b>DQB1</b> | <b>DQB2</b> | <b>DRB1</b> | <b>DRB2</b> | <b>DRB3</b> | <b>DRB4</b> | <b>DRB5</b> |
|--------------------|-------------|-------------|-------------|-------------|-------------|-------------|-------------|-------------|-------------|
| Hu-56              | 01:02       | 05:05       | 03:01       | 05:02       | 11:01       | 16:01       |             |             |             |
| Hu-195             | 01:04       | 05:05       | 03:01       | 06:01       | 13:03       | 14:04       |             |             |             |
| KAS011             | 01:02       | 01:02       | 05:02       | 05:02       | 16:01       | 16:01       |             |             |             |
| Hu-66              | 01:02       | 05:01       | 02:01       | 06:02       | 03:01       | 15:01       | 01:01       |             | 01:01       |
| Hu-37              | 01:02       | 03:03       | 02:02       | 06:02       | 04:03       | 15:01       |             | 01:03       | 01:01       |
| Hu-159             | 05:05       | 02:02       | 03:19       | 07:01       | 11:02       | 15:01       | 03:01       | 01:01       |             |
| Hu-198             | 01:03       | 05:01       | 02:01       | 06:03       | 03:01       | 13:01       |             |             |             |
| D66                | N/A         | N/A         | 05:01       | 06:02       | 01:01       | 15:01       |             |             | 01:01       |
| D8                 | 01:02       | 01:03       | 06:02       | 06:03       | 13:01       | 15:01       |             |             | 01:01       |
| GM3107             | N/A         | N/A         | 06:02       | 06:02       | 15:01       | 15:01       |             |             | 01:01       |

**Supplemental Table S6: Peptides representing recurrent cancer mutations.**

| Peptide Sequence                           | Gene   | aaPos | aaRef | aaAlt | mut.pos |
|--------------------------------------------|--------|-------|-------|-------|---------|
| FGLAT <b>E</b> KSRWGS <del>SHQ</del> FEQLS | BRAF   | 600   | V     | E     | 6       |
| EDLTVKIGDFGLAT <b>E</b> KSRWS              | BRAF   | 600   | V     | E     | 15      |
| VVVGAD <b>G</b> VGKSALTIQLIQN              | KRAS   | 12    | G     | D     | 6       |
| MTEYKLVVVGAD <b>G</b> VGKSALT              | KRAS   | 12    | G     | D     | 12      |
| VVVGAV <b>G</b> VGKSALTIQLIQN              | KRAS   | 12    | G     | V     | 6       |
| MTEYKLVVVGAV <b>G</b> VGKSALT              | KRAS   | 12    | G     | V     | 12      |
| LSEIT <b>K</b> QEKDFLWSHRHYCV              | PIK3CA | 545   | E     | K     | 6       |
| LKAISTRDPLSEIT <b>K</b> QEKDF              | PIK3CA | 545   | E     | K     | 15      |
| PSGGD <b>H</b> FCLGQLSNVHRTEA              | SMAD4  | 361   | R     | H     | 6       |
| IVTVDGYVDPSSGGD <b>H</b> FCLGQ             | SMAD4  | 361   | R     | H     | 15      |

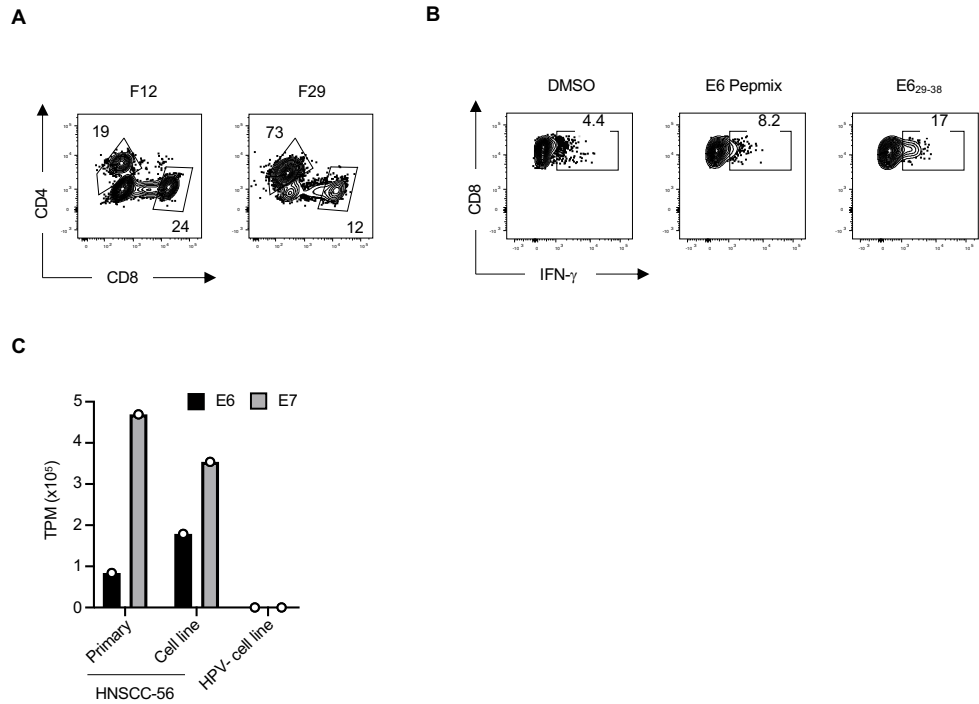

**Supplemental Figure S1: Cellular composition and epitope specificity of F29 TIL and HPV RNA expression by Hu-56 cell line and primary tumor.** **A** Representative flow cytometry plots demonstrating percentage of CD4<sup>+</sup> and CD8<sup>+</sup> TIL among F12 and F29. **B** Cytokine secretion assay results demonstrating secretion of IFN- $\gamma$  by CD8<sup>+</sup> TIL after stimulation with either E6 pepmix or E6<sub>29-38</sub>. Representative FACS plots from two independent experiments. **C** Quantification of RNA transcript reads expressed as transcripts per million (TPM) mapping to the indicated HPV-16 genes in HNSCC-56 primary tumor, HNSCC-56 cell line, and an HPV<sup>-</sup> control cell line.

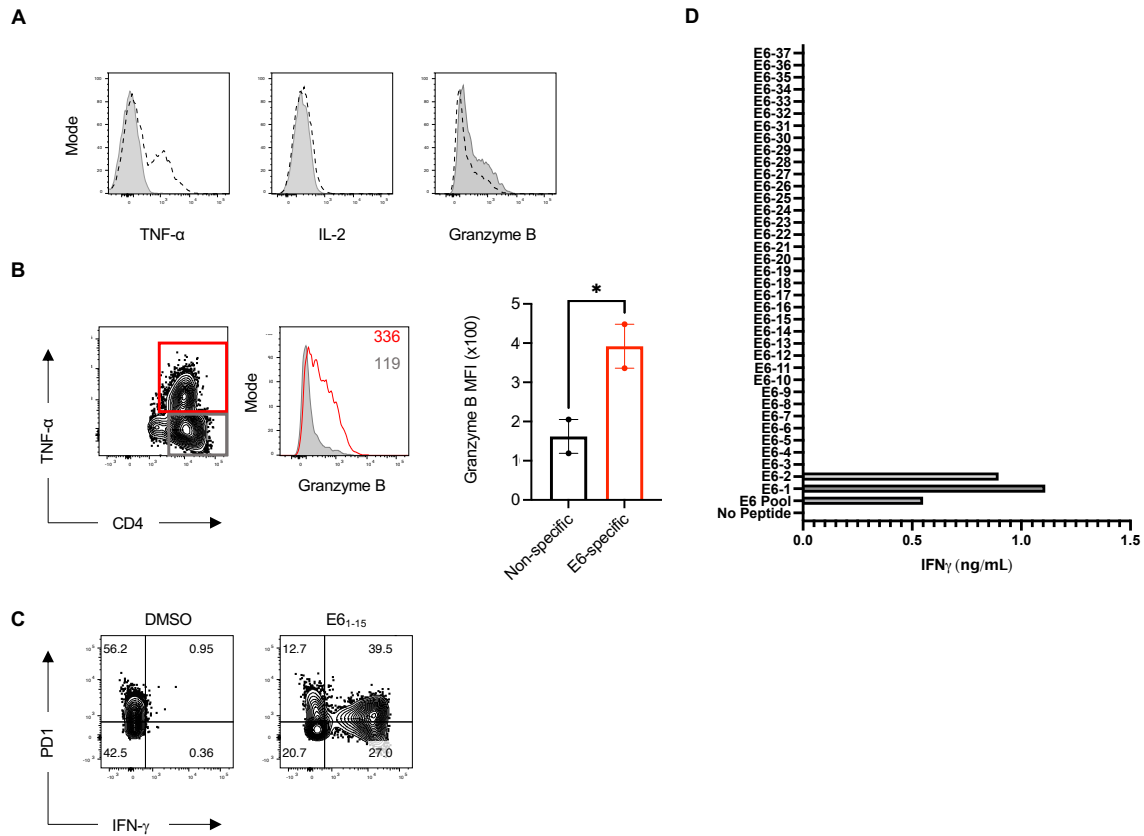

**Supplemental Figure S2: Cytokine production, surface phenotype, and epitope specificity of E6-specific CD4<sup>+</sup> TIL.** **A** Representative FACS plots demonstrating intracellular cytokine staining of unstimulated (grey) or E6-stimulated (dashed line) F12 REP TIL for indicated cytokines. **B** TNF- $\alpha$  + and - cells were gated as a surrogate for E6-specific and non-specific, respectively, to determine the relative abundance of intracellular granzyme B in these two subsets. Data are representative of mean  $\pm$  SEM from 2 independent experiments. \*  $p < 0.05$  paired T-test. **C** Representative FACS plots of unstimulated (left) or E6-stimulated (right) F12 REP TIL stained for intracellular IFN- $\gamma$  and surface PD1. **D** Individual peptides from the E6 pepmix (Table S1) were pulsed onto autologous B-LCLs prior to culture with E6-specific CD4<sup>+</sup> TIL. IFN- $\gamma$  secretion was measured by ELISA. Data is representative of 2 independent experiments.

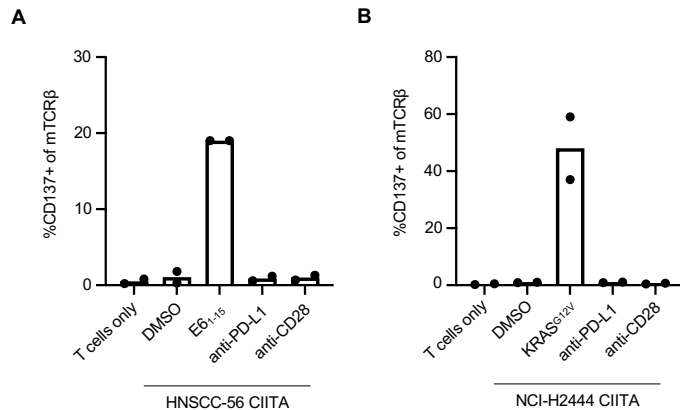

**Supplemental Figure S3: Addition of anti-CD28 agonist or anti-PD-L1 blocking antibodies do not impact tumor recognition by CD4<sup>+</sup> T cells.** **A** Quantification of CD137 upregulation after coculture of E6-specific F12 TCR-engineered CD4<sup>+</sup> T cells with HNSCC-56 CIITA tumor cells with or without 1  $\mu$ g/ml E6<sub>1-15</sub> peptide, 10  $\mu$ g/ml anti-PD-L1, or 5  $\mu$ g/ml anti-CD28. Data represent two independent experiments. **B** Quantification of CD137 upregulation after coculture of KRAS<sup>G12V</sup>-specific TCR-engineered CD4<sup>+</sup> T cells with NCI-H2444 CIITA tumor cells with or without 1  $\mu$ g/ml KRAS<sup>G12V</sup> peptide, 10  $\mu$ g/ml anti-PD-L1, or 5  $\mu$ g/ml anti-CD28. Data represent two independent experiments.



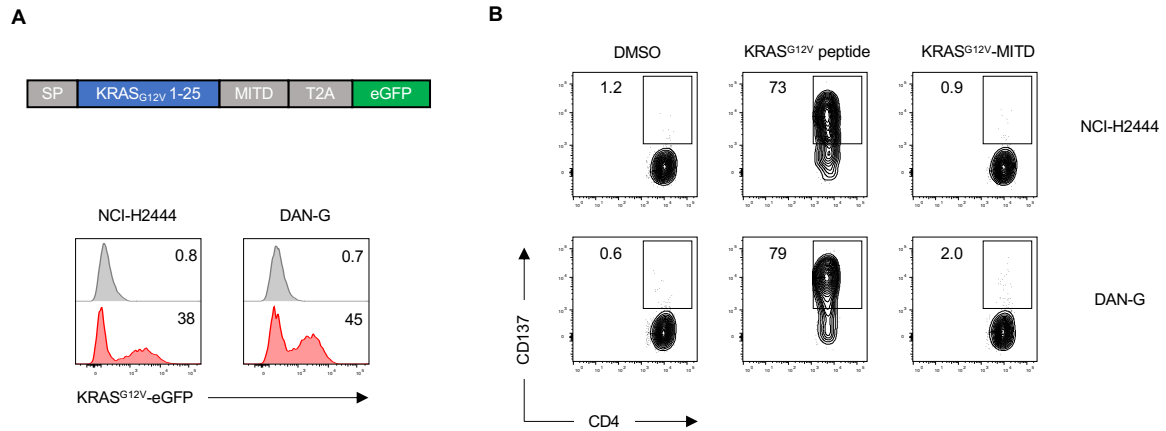

**Supplemental Figure S4: Membrane-anchored KRAS<sup>G12V</sup> is not sufficient to promote direct recognition by CD4<sup>+</sup> T cells.** **A** Schematic of KRAS<sup>G12V</sup>-MITD construct (top) and transduction efficiency of NCI-H2444 and DAN-G measured by eGFP expression (bottom). **B** FACS plots demonstrating CD137 upregulation after coculture of TCR-engineered CD4<sup>+</sup> T cells with designated CIITA/HLA-DRB5\*01:01-expressing tumor lines pulsed with DMSO, KRAS<sup>G12V</sup> peptide, or expressing the endogenous KRAS<sup>G12V</sup>-MITD construct. Data representative of 2 independent experiments.
